# Supplementary material for: A neurobiological association of revenge propensity during intergroup conflict
Source: eLife. 2020 Mar 3;9:e52014. doi: 10.7554/eLife.52014 (PMC7058385; doi:10.7554/eLife.52014)
Supplement: Figure 3—source data 1. [file elife-52014-fig3-data1.csv]

subID	condition	Time	OT
1	Revenge	OT1	40.38
2	Revenge	OT1	18.273
3	Revenge	OT1	29.3
4	Revenge	OT1	18.13
5	Revenge	OT1	87.413
6	Revenge	OT1	35.15
7	Revenge	OT1	92.905
8	Revenge	OT1	98.1
9	Revenge	OT1	88.599
10	Revenge	OT1	43.764
11	Revenge	OT1	39.122
12	Revenge	OT1	241.329
13	Revenge	OT1	34.403
14	Revenge	OT1	85.848
15	Revenge	OT1	69.117
16	Revenge	OT1	30.279
17	Revenge	OT1	48.391
18	Revenge	OT1	44.611
19	Revenge	OT1	21.726
20	Revenge	OT1	44.585
21	Revenge	OT1	96.033
22	Revenge	OT1	26.394
23	Revenge	OT1	12.111
24	Revenge	OT1	127.931
25	Revenge	OT1	30.863
26	Revenge	OT1	33.734
27	Revenge	OT1	30.362
28	Revenge	OT1	51.484
29	Revenge	OT1	144.857
30	Revenge	OT1	25.897
31	Revenge	OT1	40.339
32	Revenge	OT1	27.902
33	Revenge	OT1	26.308
34	Revenge	OT1	61.25
35	Revenge	OT1	73.345
36	Revenge	OT1	186.107
37	Revenge	OT1	28.367
41	Control	OT1	50.781
42	Control	OT1	22.678
43	Control	OT1	29.517
44	Control	OT1	52.038
45	Control	OT1	11.232
46	Control	OT1	0.881
47	Control	OT1	14.473
48	Control	OT1	0.2
49	Control	OT1	73.886
50	Control	OT1	0.2
51	Control	OT1	22.116
52	Control	OT1	6.505
53	Control	OT1	18.918
54	Control	OT1	4.998
55	Control	OT1	0.406
56	Control	OT1	175.727
57	Control	OT1	2.237
58	Control	OT1	19.735
59	Control	OT1	21.547
60	Control	OT1	22.149
61	Control	OT1	9.098
62	Control	OT1	41.213
63	Control	OT1	2.081
64	Control	OT1	8.932
65	Control	OT1	2.913
66	Control	OT1	12.859
67	Control	OT1	11.746
68	Control	OT1	20.065
69	Control	OT1	88.916
70	Control	OT1	11.319
71	Control	OT1	29.895
72	Control	OT1	8.887
73	Control	OT1	11.282
74	Control	OT1	55.607
75	Control	OT1	0.367
76	Control	OT1	58.952
77	Control	OT1	14.565
78	Control	OT1	34.194
79	Control	OT1	0.804
80	Control	OT1	13.457
1	Revenge	OT2	62.82
2	Revenge	OT2	47.886
3	Revenge	OT2	57.092
4	Revenge	OT2	50.805
5	Revenge	OT2	243.533
6	Revenge	OT2	44.47
7	Revenge	OT2	188.974
8	Revenge	OT2	75.054
9	Revenge	OT2	197.128
10	Revenge	OT2	86.399
11	Revenge	OT2	96.821
12	Revenge	OT2	195.311
13	Revenge	OT2	46.817
14	Revenge	OT2	143.547
15	Revenge	OT2	105.793
16	Revenge	OT2	259.597
17	Revenge	OT2	132.325
18	Revenge	OT2	95.455
19	Revenge	OT2	100.301
20	Revenge	OT2	162.429
21	Revenge	OT2	74.293
22	Revenge	OT2	56.445
23	Revenge	OT2	28.093
24	Revenge	OT2	55.357
25	Revenge	OT2	66.733
26	Revenge	OT2	38.658
27	Revenge	OT2	59.703
28	Revenge	OT2	131.224
29	Revenge	OT2	203.551
30	Revenge	OT2	84.042
31	Revenge	OT2	58.504
32	Revenge	OT2	103.649
33	Revenge	OT2	75.34
34	Revenge	OT2	120.811
35	Revenge	OT2	129.81
36	Revenge	OT2	196.167
37	Revenge	OT2	54.186
41	Control	OT2	101.626
42	Control	OT2	53.607
43	Control	OT2	92.189
44	Control	OT2	63.141
45	Control	OT2	62.155
46	Control	OT2	5.149
47	Control	OT2	16.612
48	Control	OT2	10.569
49	Control	OT2	111.862
50	Control	OT2	4.109
51	Control	OT2	12.825
52	Control	OT2	20.017
53	Control	OT2	32.132
54	Control	OT2	2.564
55	Control	OT2	8.038
56	Control	OT2	166.523
57	Control	OT2	8.305
58	Control	OT2	86.117
59	Control	OT2	101.291
60	Control	OT2	14.227
61	Control	OT2	7.249
62	Control	OT2	133.175
63	Control	OT2	18.24
64	Control	OT2	41.588
65	Control	OT2	9.608
66	Control	OT2	84.044
67	Control	OT2	18.706
68	Control	OT2	17.422
69	Control	OT2	82.408
70	Control	OT2	27.007
71	Control	OT2	50.635
72	Control	OT2	31.093
73	Control	OT2	17.97
74	Control	OT2	97.418
75	Control	OT2	27.699
76	Control	OT2	69.461
77	Control	OT2	46.009
78	Control	OT2	81.959
79	Control	OT2	42.42
80	Control	OT2	19.744
1	Revenge	OT3	21.495
2	Revenge	OT3	9.832
3	Revenge	OT3	35.142
4	Revenge	OT3	24.042
5	Revenge	OT3	122.41
6	Revenge	OT3	34.467
7	Revenge	OT3	67.162
8	Revenge	OT3	78.227
9	Revenge	OT3	49.239
10	Revenge	OT3	35.971
11	Revenge	OT3	47.595
12	Revenge	OT3	172.23
13	Revenge	OT3	59.672
14	Revenge	OT3	98.348
15	Revenge	OT3	55.633
16	Revenge	OT3	291.724
17	Revenge	OT3	44.251
18	Revenge	OT3	55.235
19	Revenge	OT3	17.831
20	Revenge	OT3	48.406
21	Revenge	OT3	42.267
22	Revenge	OT3	28.03
23	Revenge	OT3	53.248
24	Revenge	OT3	60.004
25	Revenge	OT3	55.893
26	Revenge	OT3	24.583
27	Revenge	OT3	23.416
28	Revenge	OT3	50.691
29	Revenge	OT3	145.602
30	Revenge	OT3	30.109
31	Revenge	OT3	43.663
32	Revenge	OT3	44.731
33	Revenge	OT3	33.955
34	Revenge	OT3	74.868
35	Revenge	OT3	41.293
36	Revenge	OT3	92.404
37	Revenge	OT3	42.011
41	Control	OT3	36.24
42	Control	OT3	10.461
43	Control	OT3	38.914
44	Control	OT3	27.426
45	Control	OT3	25.228
46	Control	OT3	1.449
47	Control	OT3	9.013
48	Control	OT3	3.679
49	Control	OT3	34.784
50	Control	OT3	4.156
51	Control	OT3	59.572
52	Control	OT3	11.078
53	Control	OT3	15.431
54	Control	OT3	1.931
55	Control	OT3	0.2
56	Control	OT3	79.697
57	Control	OT3	5.241
58	Control	OT3	0.32
59	Control	OT3	13.623
60	Control	OT3	17.898
61	Control	OT3	5.484
62	Control	OT3	34.974
63	Control	OT3	4.223
64	Control	OT3	8.753
65	Control	OT3	17.066
66	Control	OT3	20.331
67	Control	OT3	7.749
68	Control	OT3	13.986
69	Control	OT3	127.414
70	Control	OT3	9.3
71	Control	OT3	7.405
72	Control	OT3	7.809
73	Control	OT3	7.148
74	Control	OT3	44.78
75	Control	OT3	10.613
76	Control	OT3	46.752
77	Control	OT3	24.073
78	Control	OT3	50.291
79	Control	OT3	7.109
80	Control	OT3	17.386
