# Supplementary material for: A neurobiological association of revenge propensity during intergroup conflict
Source: eLife. 2020 Mar 3;9:e52014. doi: 10.7554/eLife.52014 (PMC7058385; doi:10.7554/eLife.52014)
Supplement: Figure 4—source data 1. [file elife-52014-fig4-data1.csv]

subID	condition	Involve	InOut	IFG_L	IFG_R	MPFC	TPJ_L
1	Revenge	Involved	Ingroup	-0.182879062679907	-0.638050092592541	0.113556954738809	0.0186051570344716
2	Revenge	Involved	Ingroup	1.76002669334412	0.713988698271446	-0.565153047728997	0.73656018357724
3	Revenge	Involved	Ingroup	-0.36316482614105	-0.275812082349531	0.205168497381517	0.473159886198118
4	Revenge	Involved	Ingroup	-0.370701892485764	-0.444302815919448	-0.242389322168982	0.361132671239886
5	Revenge	Involved	Ingroup	1.41651493116903	0.135219366865625	0.294503257305433	0.458480851259083
6	Revenge	Involved	Ingroup	0.426315009361133	0.428361729014126	0.524773708759592	0.642250733915716
7	Revenge	Involved	Ingroup	0.10058305816104	0.513194593429369	1.35555550438137	0.231608562171459
8	Revenge	Involved	Ingroup	0.0614803448576519	0.585646711240866	0.546352308207693	-0.0148357563884929
9	Revenge	Involved	Ingroup	0.784538346653183	1.2716882266962	0.861183626075777	0.892471277853474
10	Revenge	Involved	Ingroup	0.140062761997494	-0.0412593554141686	0.694409120974832	-0.120933112222701
11	Revenge	Involved	Ingroup	0.311029411270283	0.460331268112273	-0.786726189920536	1.55508474051021
12	Revenge	Involved	Ingroup	0.932120616702984	0.822987365413849	0.898598400481905	-0.344550336711109
13	Revenge	Involved	Ingroup	-0.227207709647094	0.345135387253801	-0.191237672160451	-0.457440600946679
14	Revenge	Involved	Ingroup	0.258187139950072	0.256829273825707	0.0870894477881778	-0.00466388370841742
15	Revenge	Involved	Ingroup	0.0337016972868394	-0.183088307563019	0.530041607132611	-0.609954386949539
16	Revenge	Involved	Ingroup	0.235891288282195	0.662426765334155	0.605065934145107	-0.222853706567548
17	Revenge	Involved	Ingroup	0.291755271687483	1.07482739221795	0.707743368326471	-0.756448986241594
18	Revenge	Involved	Ingroup	-0.103949967538938	-0.154567711301895	-0.365601652445128	1.07814638875425
19	Revenge	Involved	Ingroup	-0.405618296106695	0.46531620795232	-0.289553745054246	-0.368523453478701
20	Revenge	Involved	Ingroup	0.242263009597082	0.640087879507949	0.261462556126599	1.00690610241145
21	Revenge	Involved	Ingroup	1.12826187714624	1.26425427727793	0.575209440144065	0.463522495701909
22	Revenge	Involved	Ingroup	0.441904978516201	0.115572754391714	-0.138660131953657	0.214635986369103
23	Revenge	Involved	Ingroup	-0.116919888804356	0.213181306559004	-0.824850645587923	-0.827548865257995
24	Revenge	Involved	Ingroup	-0.0755033162422478	0.499761100564348	0.000562696663949369	-0.341594187143658
25	Revenge	Involved	Ingroup	0.380068277940154	0.472384377162119	0.808022842455942	0.771613523407723
26	Revenge	Involved	Ingroup	0.991125625402977	0.747920909263868	-0.154449492227286	0.136517116101459
27	Revenge	Involved	Ingroup	0.744096961745527	0.0608752682854078	0.186645552730904	0.453523139585741
28	Revenge	Involved	Ingroup	0.316536741467038	1.99624087716649	0.642990907833267	0.153981102223042
29	Revenge	Involved	Ingroup	1.06807186309015	-0.134168087150963	1.13630010868208	0.516707503265934
30	Revenge	Involved	Ingroup	0.174160197833165	-0.0484915855647016	-0.204310733216027	-0.483806691287706
31	Revenge	Involved	Ingroup	0.434297141541416	0.0683493203771497	0.366608907898458	0.882701211725362
32	Revenge	Involved	Ingroup	0.213146092991034	-0.144648572540303	0.590291409950273	0.161145807011053
33	Revenge	Involved	Ingroup	0.258242114408252	0.213314153094727	0.404091044651488	-0.576510640792549
34	Revenge	Involved	Ingroup	-0.179218751339552	0.834674538073351	0.549131498219839	0.93388074147515
35	Revenge	Involved	Ingroup	0.255049323663116	0.412146504030955	0.938636832644988	0.356523066759109
36	Revenge	Involved	Ingroup	0.0472475650021806	0.882933776991099	0.600436474884191	-0.509240592587332
37	Revenge	Involved	Ingroup	0.467319776924948	0.324701198024406	0.0713433592866821	0.835177277607727
38	Revenge	Involved	Ingroup	0.0368489326986794	0.322505060019658	-0.221126924713294	0.565545242236112
39	Revenge	Involved	Ingroup	0.319784894585609	0.123174864552898	1.44636896381585	-0.569812487694435
40	Revenge	Involved	Ingroup	0.0938951364466144	0.393209739704616	0.0525269122758452	0.796445282816421
41	Control	Involved	Ingroup	0.3810749562399	0.759490623334913	0.725918188596552	1.12867652376493
42	Control	Involved	Ingroup	0.723073376269895	0.957733718642741	0.333276277393452	0.502994189194093
43	Control	Involved	Ingroup	0.958111015148461	0.283613608206475	-0.115858882362954	0.600755363702774
44	Control	Involved	Ingroup	0.109984379145317	-0.370142235861797	0.208588157911436	-0.783007606863975
45	Control	Involved	Ingroup	0.101010023892741	-0.294101969106123	-0.126110111247726	-0.314594218546214
46	Control	Involved	Ingroup	0.108493023464689	1.7330219991211	1.3951510200277	1.58211449378481
47	Control	Involved	Ingroup	0.00442946788461995	0.420981281037185	-0.123954006936401	0.208125821625193
48	Control	Involved	Ingroup	0.640440684597706	0.479807088712206	0.0585293872572947	1.86284752686818
49	Control	Involved	Ingroup	0.710531215416268	0.403176376737017	0.663214194122702	-0.257115299813449
50	Control	Involved	Ingroup	0.168211182084633	0.106437685277534	-0.0158582648728043	-1.09616001291821
51	Control	Involved	Ingroup	0.52301567432005	0.541012933998565	1.86810243382934	0.386857610195875
52	Control	Involved	Ingroup	0.542501747549977	0.383139589635998	-0.229850169298394	0.140356951936459
53	Control	Involved	Ingroup	0.416265648818808	-0.0752894846082199	1.55788959743222	-0.161277898587286
54	Control	Involved	Ingroup	-0.109386809104763	-0.0736721896223331	0.507688012847211	-0.264166835462674
55	Control	Involved	Ingroup	-0.389326610136777	-0.298823812553708	-0.570228319098533	-0.416855994534368
56	Control	Involved	Ingroup	1.09542260348098	1.2798702110855	1.02175908476056	0.445888254791498
57	Control	Involved	Ingroup	0.610603680368513	-0.118840864222301	0.23709188925568	-1.80052070661138
58	Control	Involved	Ingroup	1.12187390588224	0.456440826510324	0.861467943235766	-0.0586670391979471
59	Control	Involved	Ingroup	0.0957982249528868	-0.166605059976542	0.993819426599657	0.0397196412086487
60	Control	Involved	Ingroup	-0.405773497070186	-0.276331117168363	-0.120654784371254	0.438952323049307
61	Control	Involved	Ingroup	-0.889108278730419	-0.422243427846728	-1.52359572887265	0.849125363398343
62	Control	Involved	Ingroup	-0.518345667223912	0.0321343916125204	0.0566568253634614	0.174682608495156
63	Control	Involved	Ingroup	-0.490879875229439	0.0604170941698708	0.0886397377980757	0.0272929072380066
64	Control	Involved	Ingroup	0.525437581120059	-0.391208648920598	1.49873655460397	0.147316434110204
65	Control	Involved	Ingroup	0.63706476821244	0.209887214507082	0.560515602224768	0.124928854095439
66	Control	Involved	Ingroup	0.758058064355282	0.741522775190931	2.15360316404258	0.286203497399886
67	Control	Involved	Ingroup	0.1226711376803	0.560893264464348	-0.012902966913316	0.083849827448527
68	Control	Involved	Ingroup	0.765519628301263	0.0910988551331684	0.857793568196939	-0.172024399507791
69	Control	Involved	Ingroup	0.655882086946804	0.717139713762184	0.297624474653276	0.1840159787486
70	Control	Involved	Ingroup	-0.0489694903870779	0.334593215173012	0.400871078403725	0.594012855552137
71	Control	Involved	Ingroup	-0.473880465491675	-0.15150279363412	-0.313690929862787	0.673825376977523
72	Control	Involved	Ingroup	0.638810098927934	0.00549137918278569	0.622891597027774	0.0286005909244219
73	Control	Involved	Ingroup	0.285064637602773	-0.159501982203342	-1.06899129331282	0.766757818404585
74	Control	Involved	Ingroup	0.0666948723956011	-0.288075812182797	-0.0777421162056271	0.342846506275237
75	Control	Involved	Ingroup	-0.0295758121319523	0.125674659312752	0.508849366917275	-0.522920054616407
76	Control	Involved	Ingroup	-0.105816437906469	-0.389093361421194	0.976499695243547	0.15094927046448
77	Control	Involved	Ingroup	0.38862209967192	-0.149746455203154	0.480888914200477	0.0724138411072393
78	Control	Involved	Ingroup	-0.1165868959215	-0.297463700977938	0.141270576248644	-0.568386709094436
79	Control	Involved	Ingroup	0.198798246856313	0.413913217152616	-0.0729442734045733	0.478912986814976
80	Control	Involved	Ingroup	0.495599520960241	0.846567740605678	1.05207000047267	1.11163692176342
1	Revenge	Involved	Outgroup	-0.00776385725475848	0.0833196884762545	0.0175475724614583	0.0395995685830712
2	Revenge	Involved	Outgroup	0.102089261015256	0.598844145097629	0.510005323108859	-0.199090842623264
3	Revenge	Involved	Outgroup	0.466220148373395	0.312970008725595	1.27773657762625	0.0637656940380111
4	Revenge	Involved	Outgroup	-0.788895142264664	-0.181243941187859	-0.017020204032843	0.316877047647722
5	Revenge	Involved	Outgroup	-0.54051111448401	-0.313471950566102	-0.559846855735836	0.0391664066701196
6	Revenge	Involved	Outgroup	0.11929935333319	-0.259246946122546	-0.239488863726505	0.826711116787919
7	Revenge	Involved	Outgroup	-0.189998395973817	-0.159889473157053	0.722571145814772	-0.691393788903952
8	Revenge	Involved	Outgroup	0.509322403852517	0.340695376036245	0.794266858879172	0.867572758928873
9	Revenge	Involved	Outgroup	-0.0404658919821183	0.433496963278709	0.348203412686976	0.020770542207174
10	Revenge	Involved	Outgroup	-0.395676009958455	0.307722822321873	0.404474081829763	1.02161980138044
11	Revenge	Involved	Outgroup	0.26872028154321	0.336715011379535	0.00512123998487368	0.246221563778818
12	Revenge	Involved	Outgroup	0.299192338095357	0.794288946936017	0.0484096932207019	0.726360581116751
13	Revenge	Involved	Outgroup	0.427242844986419	-0.33150910702534	-0.121650720176359	-0.250726350117475
14	Revenge	Involved	Outgroup	-0.0258399093096765	0.174524115472052	-0.245499219969273	1.01877402886748
15	Revenge	Involved	Outgroup	-0.838595255704907	-0.957942661682242	-0.0859343474506973	-0.015986965270713
16	Revenge	Involved	Outgroup	-0.165655371422569	0.440815447511053	0.197627153534156	0.0975720069691306
17	Revenge	Involved	Outgroup	1.00993450420598	1.09663640942553	0.843644987075375	-0.717526443739189
18	Revenge	Involved	Outgroup	-0.191055695215861	-0.174555320709356	0.341599510910992	0.432368937879801
19	Revenge	Involved	Outgroup	-0.0591603421295682	1.07275701400297	0.119722161388311	0.782426156452857
20	Revenge	Involved	Outgroup	0.52007817539076	-0.121889184449652	0.415904021302525	-0.197369216417428
21	Revenge	Involved	Outgroup	-0.650186876669371	-1.33801043846056	-0.1140284016012	-1.19540071144002
22	Revenge	Involved	Outgroup	-0.0995522016504158	0.215330320520719	-0.236500425837361	0.149534602183849
23	Revenge	Involved	Outgroup	-0.470359720134487	-0.572657825541682	-0.012521464511967	-0.568817794090137
24	Revenge	Involved	Outgroup	0.0337126213125885	0.908051257781488	0.273561088959328	-0.112703908900065
25	Revenge	Involved	Outgroup	-0.147246751357064	-0.0339799203517798	0.62045134346968	0.0658216483716387
26	Revenge	Involved	Outgroup	-0.0674037497180204	0.537542446884081	0.288203727695733	0.326897468417883
27	Revenge	Involved	Outgroup	0.00803613883908832	0.352654649079532	0.648249776496624	0.250022368505597
28	Revenge	Involved	Outgroup	-0.305580349251007	0.774820668439038	0.35298000005647	-0.0462342149112374
29	Revenge	Involved	Outgroup	0.925576855127777	0.486090366422248	1.21304204042714	1.47585396561772
30	Revenge	Involved	Outgroup	-0.221221373426185	-1.02904055993024	-1.43763818391241	-1.56272287294269
31	Revenge	Involved	Outgroup	-0.0722150641765135	0.211996968431202	0.720835835230761	-0.0554178468883038
32	Revenge	Involved	Outgroup	-0.212734893585245	-0.280240634499167	-0.0993663698766166	-0.444852276006714
33	Revenge	Involved	Outgroup	0.884045973342533	0.0403343476600161	0.829000788624398	0.110271438490599
34	Revenge	Involved	Outgroup	0.381483259455611	0.609509622433076	1.0982968481974	-0.136989647522569
35	Revenge	Involved	Outgroup	0.551146020705346	0.00827593724610967	0.461400249399818	0.403043222613633
36	Revenge	Involved	Outgroup	-0.304006291863819	-0.163396585990038	-1.79576566369118	-1.03828333842102
37	Revenge	Involved	Outgroup	0.242841768738193	0.381063918158792	0.144900478918526	-0.232428323244676
38	Revenge	Involved	Outgroup	0.281728801472733	0.421074785059318	0.327268689870835	-0.346159036911558
39	Revenge	Involved	Outgroup	-0.270565380264694	-0.194503414266939	0.870784634294418	0.140738820191473
40	Revenge	Involved	Outgroup	0.501873386509639	0.0312595441110284	0.729894590452134	0.23194562876597
41	Control	Involved	Outgroup	-0.0445762654999271	0.381091828335469	-0.0438183040439526	0.9011894754755
42	Control	Involved	Outgroup	-0.102047496533487	-0.222627105421117	-0.354285902132688	0.626027663820423
43	Control	Involved	Outgroup	0.243064644513652	0.34433964286482	-1.37363139130175	1.06601541768759
44	Control	Involved	Outgroup	0.898087126694975	1.04179029583343	0.000315670065901941	0.0431197851430625
45	Control	Involved	Outgroup	0.365554622228956	-0.0857059402991773	0.499544445270658	0.462076836576064
46	Control	Involved	Outgroup	0.105164634616813	0.504988462995051	0.487584922026144	1.06654318918784
47	Control	Involved	Outgroup	-0.032811277982546	-0.0289301542338523	0.181380353518762	-0.241292037690679
48	Control	Involved	Outgroup	0.558142529742327	-0.130957814521695	0.461370947479736	-0.78040690968434
49	Control	Involved	Outgroup	-0.527250187995378	0.20737094774009	0.457763437618269	0.35518021749643
50	Control	Involved	Outgroup	0.516775260563008	-0.126607338867248	1.42445761301497	0.407637427871426
51	Control	Involved	Outgroup	0.461129167516901	-0.295737621215123	0.676185401767725	0.513693642802536
52	Control	Involved	Outgroup	0.397176150348969	-0.0779090542836407	0.191388849634677	-1.13538093244036
53	Control	Involved	Outgroup	-0.000273615392416104	-0.067510757083686	-0.255486490728799	0.00449296832084656
54	Control	Involved	Outgroup	0.373729702594574	0.100548708339614	1.74975981642683	-0.396526928835859
55	Control	Involved	Outgroup	-0.0911315423436463	-0.390744062422432	-0.0612144328988506	-0.580477905614923
56	Control	Involved	Outgroup	0.226983142376412	0.888816738182581	0.519147311453708	0.305774631599585
57	Control	Involved	Outgroup	0.325487593378057	0.622570811776984	0.0579776103259064	0.274032098551591
58	Control	Involved	Outgroup	1.60587179102004	1.40641380896743	1.09070833347505	-0.732327187356229
59	Control	Involved	Outgroup	0.194391358760186	0.28522569999883	0.0853621636561002	0.0192464914483329
60	Control	Involved	Outgroup	0.240430943667889	-0.20996445281765	0.155364139471203	-0.300630424171686
61	Control	Involved	Outgroup	0.298121630796231	1.1202829847676	0.536527449005128	0.75682335626334
62	Control	Involved	Outgroup	-0.180965861101868	0.159434331970069	0.192192458169302	0.464051126192013
63	Control	Involved	Outgroup	0.0708754223305732	0.468830089819293	-0.162898005801253	0.287273767093817
64	Control	Involved	Outgroup	0.327609859989025	1.28670876937931	-0.231877595528204	-0.0537557654703658
65	Control	Involved	Outgroup	-0.13351918652188	-0.407626349561676	-0.566452748724259	0.386849710834213
66	Control	Involved	Outgroup	-0.420647177554201	-0.208218840036639	0.438721616629664	-0.0582118257880211
67	Control	Involved	Outgroup	-0.333588277819217	0.203424746807861	-0.768006483762292	0.0599676913892229
68	Control	Involved	Outgroup	0.142499019726529	0.292629780725723	1.30801863851957	0.442235487513244
69	Control	Involved	Outgroup	1.19360490207328	0.160025297303372	1.01101401780033	1.27649942987288
70	Control	Involved	Outgroup	-0.122139685264821	-0.260582866453517	0.217597238764029	-0.225593308607737
71	Control	Involved	Outgroup	0.125555079779588	0.42467267496977	-0.194875352026429	-0.118220583846172
72	Control	Involved	Outgroup	0.584784629245405	-0.615182918631227	0.685002319464729	0.548006807764371
73	Control	Involved	Outgroup	0.579463872447377	0.180444860689979	0.634669766790466	0.33569523319602
74	Control	Involved	Outgroup	0.140827273047762	0.277478360515823	-0.0442251245112857	0.139869248494506
75	Control	Involved	Outgroup	-0.659288307069801	-0.0415618867080315	0.254353105061455	0.505855126403427
76	Control	Involved	Outgroup	0.26667544877273	0.186319468026723	1.11406052822713	-0.0757618335386117
77	Control	Involved	Outgroup	-0.622014476597542	-0.663279574235754	-1.46181841660291	0.00171920331195002
78	Control	Involved	Outgroup	0.00609381721005775	-0.175781726628836	-0.548764602252049	-0.00139420138051116
79	Control	Involved	Outgroup	0.163767232086684	-0.0136331222265175	0.339932897222752	0.48957559838891
80	Control	Involved	Outgroup	0.704779863473959	0.634604414300013	1.16323781642132	0.140588426341613
1	Revenge	Uninvolved	Ingroup	0.263400366694744	0.458305396911639	0.189443693806728	0.378201866988093
2	Revenge	Uninvolved	Ingroup	0.434614539146423	0.411342632518714	0.399965243705568	-0.111309084109962
3	Revenge	Uninvolved	Ingroup	0.5782158888566	-0.0500210934245077	0.747553576932599	0.653797217528336
4	Revenge	Uninvolved	Ingroup	-0.126495580002666	0.558318244121773	0.765372873563319	0.080258711706847
5	Revenge	Uninvolved	Ingroup	1.23985491149748	0.598091263881591	-0.186253372455636	0.728388039395213
6	Revenge	Uninvolved	Ingroup	0.193284454910706	0.547321174930977	0.275074466509977	-0.689938027411699
7	Revenge	Uninvolved	Ingroup	-0.527275762210289	-0.426526705385186	-0.00367452815795932	-0.194965806789696
8	Revenge	Uninvolved	Ingroup	0.185315544367768	0.136294545042083	0.725385280919727	-0.686213263426907
9	Revenge	Uninvolved	Ingroup	0.648371144275491	0.112618586293569	1.41605789245805	-0.279230597137939
10	Revenge	Uninvolved	Ingroup	-0.261390079668975	-0.275303869165088	-0.214462567244967	0.876639232970774
11	Revenge	Uninvolved	Ingroup	0.0655865107352535	-0.126339760737641	0.477257770346478	0.159564177176435
12	Revenge	Uninvolved	Ingroup	0.296236090090436	0.118661732510909	0.100195384925852	0.31284663581755
13	Revenge	Uninvolved	Ingroup	-0.500294077287739	-0.678200279203194	-0.528667767966787	-0.0632955921838792
14	Revenge	Uninvolved	Ingroup	-0.139984888626107	0.531933176821392	-0.503603846548746	1.13649757765234
15	Revenge	Uninvolved	Ingroup	0.23420165325903	-0.411939267020084	0.859178340481594	-1.12116104923189
16	Revenge	Uninvolved	Ingroup	0.349327359038095	0.253737919449218	1.18126440631847	-0.04954880772857
17	Revenge	Uninvolved	Ingroup	-0.231928268059467	-0.183658300592613	0.237987830447188	0.224260586430319
18	Revenge	Uninvolved	Ingroup	0.140300367027521	0.732906512364647	1.05237448131666	1.34222642937675
19	Revenge	Uninvolved	Ingroup	0.276616961617644	0.567873260839597	0.626923504347602	0.2636217995896
20	Revenge	Uninvolved	Ingroup	0.213863035819183	0.0150285772734174	0.720944362226874	0.729341805214062
21	Revenge	Uninvolved	Ingroup	-0.869072719166676	-0.469326998585051	-0.245413242847038	0.781106884358451
22	Revenge	Uninvolved	Ingroup	0.278182453243062	0.276938926979997	0.452040217225052	0.669391350820661
23	Revenge	Uninvolved	Ingroup	0.204748787606756	-0.343108122629163	-0.089459254592657	0.585429172380827
24	Revenge	Uninvolved	Ingroup	-0.154893600949436	-0.0880326002002939	-0.827205413393676	-0.403485778187002
25	Revenge	Uninvolved	Ingroup	0.291873676236719	0.324403826809047	1.15335027018252	0.354461099253967
26	Revenge	Uninvolved	Ingroup	0.270828424099212	0.69771054590513	1.56953280673673	-0.399051153624896
27	Revenge	Uninvolved	Ingroup	0.322575184749439	0.18320400575421	1.58299091265847	-0.238201492582448
28	Revenge	Uninvolved	Ingroup	-0.316769002238289	1.47486437271245	0.616544522484764	0.809788498154376
29	Revenge	Uninvolved	Ingroup	0.230908880039351	-0.109190975056998	0.327481998278139	0.0985197797417641
30	Revenge	Uninvolved	Ingroup	0.310048492586551	1.23617849556582	0.535924371952812	0.699657765372346
31	Revenge	Uninvolved	Ingroup	0.0294731449491034	-0.0307683895011187	0.619773963435243	0.280390331987292
32	Revenge	Uninvolved	Ingroup	-0.635288648530453	-0.617763438960537	-0.0478463360574096	0.627101269783452
33	Revenge	Uninvolved	Ingroup	0.4327100161269	-0.221122116475415	0.234578532942881	-0.16709566488862
34	Revenge	Uninvolved	Ingroup	-0.207203294662759	0.446727188157016	-0.298445019855474	0.623717212758493
35	Revenge	Uninvolved	Ingroup	0.657396196135475	0.197112884243803	0.453148674561332	0.205917608458549
36	Revenge	Uninvolved	Ingroup	0.533226806437597	0.824515836117299	-1.46299162004143	0.459297446534038
37	Revenge	Uninvolved	Ingroup	0.21000348093609	0.147497840908871	0.676806321926415	0.324524428229779
38	Revenge	Uninvolved	Ingroup	0.838465197011828	1.18848032406286	-0.156701943935089	1.16052564798156
39	Revenge	Uninvolved	Ingroup	-0.338693956999729	-0.342990328675736	0.445888208650285	-0.23759512725519
40	Revenge	Uninvolved	Ingroup	0.200958578381687	0.408603244551494	-0.370051651075482	-0.546289742924273
41	Control	Uninvolved	Ingroup	0.212121944830869	0.850678756632413	0.375282658962533	0.515071798892071
42	Control	Uninvolved	Ingroup	-0.229583666543476	0.410650116961302	-0.713488403212978	0.327795126785835
43	Control	Uninvolved	Ingroup	-0.0884008262073621	0.817272398783213	-0.414580310244734	0.821839652024209
44	Control	Uninvolved	Ingroup	0.398659012657845	0.167687247573141	-0.709115172276711	-0.0479813081522782
45	Control	Uninvolved	Ingroup	0.292480401607463	0.410296054998119	0.144853127985698	0.75588055079182
46	Control	Uninvolved	Ingroup	-0.735095340991393	0.282700282717614	-0.394497060624417	1.00174411137899
47	Control	Uninvolved	Ingroup	0.0487671394948848	0.0941766385687132	0.407073765374662	0.719986090979849
48	Control	Uninvolved	Ingroup	0.0246775062769302	0.265614803489849	-0.0778247976122657	0.167763690153758
49	Control	Uninvolved	Ingroup	0.484513706411235	-0.614043140793097	0.426676321738341	-1.88315478060395
50	Control	Uninvolved	Ingroup	-0.493831670144573	-0.456718893268293	0.441084576013964	-0.31456042205294
51	Control	Uninvolved	Ingroup	0.0902956000063568	1.14142627276382	0.622765216015978	1.25968641663591
52	Control	Uninvolved	Ingroup	0.385265817836626	0.5628952893404	0.181025711710875	1.00790795901169
53	Control	Uninvolved	Ingroup	0.374764829735796	0.209629277925399	1.17233196063899	0.204927999875508
54	Control	Uninvolved	Ingroup	0.30542883068847	0.210599634422627	0.69727282380336	-1.10794698284008
55	Control	Uninvolved	Ingroup	-0.192380950815277	-0.382714554979956	0.632167789975938	0.212218419803927
56	Control	Uninvolved	Ingroup	-0.658875556602652	-0.390169737198831	-0.10753324640973	-0.0886957701295615
57	Control	Uninvolved	Ingroup	0.614968042864348	0.417244529253558	0.809822029666975	0.887243397533893
58	Control	Uninvolved	Ingroup	1.10559346264095	1.41756836179105	0.145771464929567	0.459593365589778
59	Control	Uninvolved	Ingroup	0.0121613583760336	-0.247372926917466	0.543392596329795	0.0287262236815877
60	Control	Uninvolved	Ingroup	0.720142392383423	0.373562180633216	0.102742043498438	0.854033226089086
61	Control	Uninvolved	Ingroup	0.331786140566692	0.387063044117224	-0.114044552715495	-0.286407699342817
62	Control	Uninvolved	Ingroup	0.0886034467257559	0.257587951583494	-0.0635956703918055	-0.054802001764377
63	Control	Uninvolved	Ingroup	-0.0737259337693104	-0.0633148554234619	0.0104099786549341	0.492864886919657
64	Control	Uninvolved	Ingroup	0.260207852814347	0.137721339975925	0.297143167437753	0.140524808705474
65	Control	Uninvolved	Ingroup	-0.451221604598686	0.0919795537514514	-0.196787240915	0.868296696494023
66	Control	Uninvolved	Ingroup	0.297440924492548	0.674319331368775	0.895840463683271	-0.134044720403229
67	Control	Uninvolved	Ingroup	0.50844918563962	1.16654941034013	1.03855908571859	1.01807486017545
68	Control	Uninvolved	Ingroup	0.495251681320951	-0.858510163836304	0.427313173517177	0.881953517557122
69	Control	Uninvolved	Ingroup	0.457700487342663	-0.0804721815879212	0.533531658031279	0.590705128386617
70	Control	Uninvolved	Ingroup	-0.629897310182319	-0.510920720818256	-0.400813678599661	0.277815792088707
71	Control	Uninvolved	Ingroup	0.224489393585827	-0.566035159745202	0.337494975479785	0.521799252058069
72	Control	Uninvolved	Ingroup	0.489622188975773	-0.594765457834767	0.886864545213029	0.2424467826883
73	Control	Uninvolved	Ingroup	0.144070358946919	0.037703726707198	-0.163020533087547	-1.14637455530465
74	Control	Uninvolved	Ingroup	0.259444107767195	-0.362573042174948	0.294400792946405	0.5784972445108
75	Control	Uninvolved	Ingroup	1.04886432981584	0.565985117463003	1.13578829131438	0.146215742764374
76	Control	Uninvolved	Ingroup	-0.0918504129222129	-0.215503356039622	0.555329900016659	-0.868212004502614
77	Control	Uninvolved	Ingroup	0.693866399698891	0.230966166295969	0.555027300775691	-0.255391040894513
78	Control	Uninvolved	Ingroup	-0.234754536417313	0.0918756627116205	0.357131392211159	-0.687508334560941
79	Control	Uninvolved	Ingroup	0.229094187976443	0.0717428948570925	-0.135457701777341	0.503654455766082
80	Control	Uninvolved	Ingroup	-0.0896089032758027	0.527969044184398	0.476166235122946	-0.263508707905809
1	Revenge	Uninvolved	Outgroup	0.0508441162140419	-0.446570739609581	-0.0828872590791435	-0.240885897655971
2	Revenge	Uninvolved	Outgroup	-0.18809961527586	0.26897400010708	0.293011308306207	-0.551616741344333
3	Revenge	Uninvolved	Outgroup	-1.13132015635104	-1.31597699769037	-0.0985512825413025	-0.341347676614532
4	Revenge	Uninvolved	Outgroup	-0.366442855307832	0.257532280453138	0.77075085878217	0.333325385028729
5	Revenge	Uninvolved	Outgroup	-0.118541601036365	-0.412021503557059	-0.455636414512992	-0.977309866721043
6	Revenge	Uninvolved	Outgroup	-0.0672536388738081	0.675467948606973	-0.173392778829051	-0.349927700357512
7	Revenge	Uninvolved	Outgroup	0.860108403721824	0.284277045278271	0.287199117553731	0.335385666228831
8	Revenge	Uninvolved	Outgroup	0.679961818930072	0.936062357441283	0.476912799756974	1.54389641387388
9	Revenge	Uninvolved	Outgroup	0.223641759308521	0.198970346196898	-0.683141639415408	0.366137096658349
10	Revenge	Uninvolved	Outgroup	0.0589820121725401	-0.350494660449361	0.377278281096369	0.717803738545626
11	Revenge	Uninvolved	Outgroup	0.184004065503056	0.025086047385182	-0.106253328671058	-0.468982382211834
12	Revenge	Uninvolved	Outgroup	0.262989106588066	-0.321084930536975	0.401358606588716	-0.77234444313217
13	Revenge	Uninvolved	Outgroup	0.489774238318205	0.436282708550081	0.666529883537441	-0.412907746953091
14	Revenge	Uninvolved	Outgroup	0.656928787973205	0.23485092016084	0.255654303139697	-0.520932018291205
15	Revenge	Uninvolved	Outgroup	-0.76182216941379	-1.19324063078353	0.344660406295831	0.711295618479198
16	Revenge	Uninvolved	Outgroup	0.440379400737584	0.814335605510438	0.855887501640245	0.40940904035233
17	Revenge	Uninvolved	Outgroup	0.312237608107049	0.591784609475565	0.311718239611946	0.26033992820885
18	Revenge	Uninvolved	Outgroup	-0.194948013173416	0.353697540679652	0.746462428011	1.36600967778941
19	Revenge	Uninvolved	Outgroup	0.476314252979743	1.25317769193728	0.371398110462663	1.11986766567861
20	Revenge	Uninvolved	Outgroup	1.05447935157766	0.197325357364638	0.742831473331898	0.184144353028387
21	Revenge	Uninvolved	Outgroup	-0.511923832333802	-0.204137705854679	0.113821689109318	1.82460946403444
22	Revenge	Uninvolved	Outgroup	0.768843036300192	0.30347634787636	1.48232993708613	-0.210621148922655
23	Revenge	Uninvolved	Outgroup	0.607345971084821	0.0727712636151792	-0.0906384529701124	-0.0758719686418772
24	Revenge	Uninvolved	Outgroup	0.231687233240033	0.0863015300986405	0.625170728902412	0.336044718644449
25	Revenge	Uninvolved	Outgroup	-0.0622291616940249	-0.345031316220564	-0.0793397764364878	0.387037596316077
26	Revenge	Uninvolved	Outgroup	0.98260612799398	-0.301003256681342	-0.169444032595493	0.763130409177393
27	Revenge	Uninvolved	Outgroup	-0.290119932809224	-0.0499971019897585	-0.574756238007103	0.941971521824598
28	Revenge	Uninvolved	Outgroup	-0.0123815775538484	0.122615967999752	-0.146732894331217	0.562856207950972
29	Revenge	Uninvolved	Outgroup	0.296857857518868	-0.078776660724543	1.28773451161881	-0.0674323133425787
30	Revenge	Uninvolved	Outgroup	-0.257980951690115	-0.441770292120054	-0.390780544141308	-0.278010999783874
31	Revenge	Uninvolved	Outgroup	0.0669896888624256	-0.69092226655247	-0.814430701965466	0.377726065693423
32	Revenge	Uninvolved	Outgroup	-0.603308878887522	0.011753970119906	0.117660427702746	-0.161887190421112
33	Revenge	Uninvolved	Outgroup	0.485355868004262	0.883988996751692	0.522787817691763	0.0785070545971394
34	Revenge	Uninvolved	Outgroup	0.382931915065274	0.488488087283545	0.633605810068548	0.103878628462553
35	Revenge	Uninvolved	Outgroup	-0.300007117834563	0.0192284635268152	0.910979479978172	0.381983699655393
36	Revenge	Uninvolved	Outgroup	1.04782655710975	0.709654597694201	0.831754312772925	0.407256282924209
37	Revenge	Uninvolved	Outgroup	-0.42476043663919	-0.0125906292416499	0.552519991411828	0.115992696024477
38	Revenge	Uninvolved	Outgroup	-0.664714403178853	-1.17113858473328	0.0181563731205339	-0.466033008764498
39	Revenge	Uninvolved	Outgroup	-0.0101769177320724	0.191185988908585	-0.0204008316233134	-0.314903408114333
40	Revenge	Uninvolved	Outgroup	0.0996207672481736	0.629542694886607	-0.543570500332862	-0.101875966880471
41	Control	Uninvolved	Outgroup	0.49885805347003	1.02403802804551	0.74122580254334	0.0825349546503276
42	Control	Uninvolved	Outgroup	-0.58948876732029	-0.200036945991757	0.350329870390851	0.238047364012649
43	Control	Uninvolved	Outgroup	0.140573148317344	0.320837730664368	-1.09358013079812	1.88528773887083
44	Control	Uninvolved	Outgroup	0.0384554676129483	0.215631903443289	0.116619279004226	-0.146724331891164
45	Control	Uninvolved	Outgroup	0.242949825122196	-0.04522647488078	-0.481080650861259	0.0673218195637068
46	Control	Uninvolved	Outgroup	-0.255713457416277	-0.538290204786646	0.116096620570715	0.108544898219407
47	Control	Uninvolved	Outgroup	0.0171316426858539	-0.357581642257221	0.308835976058617	-0.501963415881619
48	Control	Uninvolved	Outgroup	-0.220643302876852	-0.422069594316111	-0.64254762235214	-0.342635561401645
49	Control	Uninvolved	Outgroup	-0.00567381072323769	-0.0502634880525109	-0.0439929178683087	0.584267905292412
50	Control	Uninvolved	Outgroup	-0.813359560910612	0.00393435039318557	0.422571703835274	-1.02241766142348
51	Control	Uninvolved	Outgroup	-0.00890421168878675	0.163207630712637	0.354638629360124	0.441717113368213
52	Control	Uninvolved	Outgroup	-0.245986565947533	-0.0321992852006683	-0.141927924034341	0.558020820569557
53	Control	Uninvolved	Outgroup	0.169860351103125	0.653093567681744	0.511225777197978	0.582790371539886
54	Control	Uninvolved	Outgroup	0.340375784879143	-0.0139175867600563	0.774037840717938	-0.995535313539828
55	Control	Uninvolved	Outgroup	-0.486581533623394	0.209297394606677	-0.897109933604952	-0.629687126725912
56	Control	Uninvolved	Outgroup	-0.491173023008741	0.0762455455750521	0.0946531302906806	-1.38943960269292
57	Control	Uninvolved	Outgroup	0.41878836179967	-0.637026463385562	0.387902987175039	-0.574468180537224
58	Control	Uninvolved	Outgroup	0.229557562586186	1.60152094502241	-0.279367900540819	-0.164914924651384
59	Control	Uninvolved	Outgroup	0.512060783788911	-0.27085669162242	0.0731003078471986	0.449785766812662
60	Control	Uninvolved	Outgroup	-0.284254007274285	-0.0270712362191835	-0.228048463497544	-0.618491034023464
61	Control	Uninvolved	Outgroup	0.648959676793311	0.919348360265997	0.459343116652841	-0.622613825369626
62	Control	Uninvolved	Outgroup	0.103007783764042	0.366121330764145	0.673172031628383	0.433142559758077
63	Control	Uninvolved	Outgroup	0.0809889891534112	-0.0652722742678108	-0.221660092298407	0.743849963958686
64	Control	Uninvolved	Outgroup	0.278369203500915	0.542677477810924	-0.124520214989957	-0.0227909367531537
65	Control	Uninvolved	Outgroup	0.398621642612852	0.301735315954398	-0.114392546325689	0.0580914641420047
66	Control	Uninvolved	Outgroup	-0.205180455661321	0.202053732777897	-0.272186988353496	0.439228253439069
67	Control	Uninvolved	Outgroup	0.867932010791264	1.44042946101705	-0.513190314493841	0.535687569839259
68	Control	Uninvolved	Outgroup	0.605124766669178	0.0604459048473999	0.362401556600162	0.0601781960576774
69	Control	Uninvolved	Outgroup	0.0955803729593754	0.322125664051303	0.158082193560404	0.240606171311811
70	Control	Uninvolved	Outgroup	-0.0504337959906219	0.720419975469428	0.231114838672511	0.464018082867066
71	Control	Uninvolved	Outgroup	-0.979433983389754	-0.204081849290033	-0.451515827415278	0.402036792909106
72	Control	Uninvolved	Outgroup	-0.4136451020604	0.376454259207668	-0.205053625511937	0.0705275566627581
73	Control	Uninvolved	Outgroup	0.652271436323645	-0.317163995473253	-0.307036173035158	0.416354410350323
74	Control	Uninvolved	Outgroup	0.745885765412822	-0.239246597807658	0.693054761679377	1.37104318663478
75	Control	Uninvolved	Outgroup	-0.54725420178147	-0.924063686354968	0.544916830054717	0.194110588403419
76	Control	Uninvolved	Outgroup	-0.251506920089014	-0.855622258809346	0.830110756360227	0.281111666350625
77	Control	Uninvolved	Outgroup	0.125307457317831	0.295611951668673	0.305468134160037	0.481536131507407
78	Control	Uninvolved	Outgroup	0.0153744679410011	-0.371623693610002	0.194067589247425	-0.12097770638987
79	Control	Uninvolved	Outgroup	0.857606461431715	0.420678551584531	1.04101662232279	0.188235917051012
80	Control	Uninvolved	Outgroup	-0.0888242831570096	0.239906961292849	-0.0560671013081446	-0.327528829375903
