# Supplementary material for: A neurobiological association of revenge propensity during intergroup conflict
Source: eLife. 2020 Mar 3;9:e52014. doi: 10.7554/eLife.52014 (PMC7058385; doi:10.7554/eLife.52014)
Supplement: Figure 5—source data 3. [file elife-52014-fig5-data3.csv]

subID	condition	OT_1	Involved_In_mPFC
sub01	Conflict	40.38	0.113556954738809
sub02	Conflict	18.273	-0.565153047728997
sub03	Conflict	29.3	0.205168497381517
sub04	Conflict	18.13	-0.242389322168982
sub05	Conflict	87.413	0.294503257305433
sub06	Conflict	35.15	0.524773708759592
sub07	Conflict	92.905	1.35555550438137
sub08	Conflict	98.1	0.546352308207693
sub09	Conflict	88.599	0.861183626075777
sub10	Conflict	43.764	0.694409120974832
sub11	Conflict	39.122	-0.786726189920536
sub14	Conflict	241.329	0.898598400481905
sub15	Conflict	34.403	-0.191237672160451
sub16	Conflict	85.848	0.0870894477881778
sub17	Conflict	69.117	0.530041607132611
sub18	Conflict	30.279	0.605065934145107
sub19	Conflict	48.391	0.707743368326471
sub20	Conflict	44.611	-0.365601652445128
sub21	Conflict	21.726	-0.289553745054246
sub22	Conflict	44.585	0.261462556126599
sub23	Conflict	96.033	0.575209440144065
sub24	Conflict	26.394	-0.138660131953657
sub25	Conflict	12.111	-0.824850645587923
sub26	Conflict	127.931	0.000562696663949369
sub27	Conflict	30.863	0.808022842455942
sub29	Conflict	33.734	-0.154449492227286
sub30	Conflict	30.362	0.186645552730904
sub31	Conflict	51.484	0.642990907833267
sub32	Conflict	144.857	1.13630010868208
sub33	Conflict	25.897	-0.204310733216027
sub34	Conflict	40.339	0.366608907898458
sub35	Conflict	27.902	0.590291409950273
sub36	Conflict	26.308	0.404091044651488
sub37	Conflict	61.25	0.549131498219839
sub38	Conflict	73.345	0.938636832644988
sub40	Conflict	186.107	0.600436474884191
sub41	Conflict	28.367	0.0713433592866821
