# Supplementary material for: A neurobiological association of revenge propensity during intergroup conflict
Source: eLife. 2020 Mar 3;9:e52014. doi: 10.7554/eLife.52014 (PMC7058385; doi:10.7554/eLife.52014)
Supplement: Figure 5—source data 4. [file elife-52014-fig5-data4.csv]

subID	condition	OT_1	Involved_In_mPFC
sub42	Control	50.781	0.725918188596552
sub43	Control	22.678	0.333276277393452
sub44	Control	29.517	-0.115858882362954
sub45	Control	52.038	0.208588157911436
sub46	Control	11.232	-0.126110111247726
sub47	Control	0.881	1.3951510200277
sub48	Control	14.473	-0.123954006936401
sub49	Control	0.2	0.0585293872572947
sub51	Control	73.886	0.663214194122702
sub52	Control	0.2	-0.0158582648728043
sub53	Control	22.116	1.86810243382934
sub55	Control	6.505	-0.229850169298394
sub56	Control	18.918	1.55788959743222
sub57	Control	4.998	0.507688012847211
sub59	Control	0.406	-0.570228319098533
sub60	Control	175.727	1.02175908476056
sub61	Control	2.237	0.23709188925568
sub62	Control	19.735	0.861467943235766
sub63	Control	21.547	0.993819426599657
sub64	Control	22.149	-0.120654784371254
sub65	Control	9.098	-1.52359572887265
sub66	Control	41.213	0.0566568253634614
sub67	Control	2.081	0.0886397377980757
sub68	Control	8.932	1.49873655460397
sub69	Control	2.913	0.560515602224768
sub70	Control	12.859	2.15360316404258
sub71	Control	11.746	-0.012902966913316
sub72	Control	20.065	0.857793568196939
sub73	Control	88.916	0.297624474653276
sub74	Control	11.319	0.400871078403725
sub75	Control	29.895	-0.313690929862787
sub76	Control	8.887	0.622891597027774
sub77	Control	11.282	-1.06899129331282
sub78	Control	55.607	-0.0777421162056271
sub79	Control	0.367	0.508849366917275
sub80	Control	58.952	0.976499695243547
sub81	Control	14.565	0.480888914200477
sub86	Control	34.194	0.141270576248644
sub88	Control	0.804	-0.0729442734045733
sub89	Control	13.457	1.05207000047267
