# Supplementary material for: A neurobiological association of revenge propensity during intergroup conflict
Source: eLife. 2020 Mar 3;9:e52014. doi: 10.7554/eLife.52014 (PMC7058385; doi:10.7554/eLife.52014)
Supplement: Figure 6—source data 1. [file elife-52014-fig6-data1.csv]

subID	condition	Involved_In_mPFC	Involved_Out_Punish	Uninvolved_Out_Punish
1	Revenge	0.113556954738809	3	4
2	Revenge	-0.565153047728997	5	3
3	Revenge	0.205168497381517	5	4
4	Revenge	-0.242389322168982	1	1
5	Revenge	0.294503257305433	4	1
6	Revenge	0.524773708759592	1	1
7	Revenge	1.35555550438137	5	3
8	Revenge	0.546352308207693	6	4
9	Revenge	0.861183626075777	4	5
10	Revenge	0.694409120974832	7	5
11	Revenge	-0.786726189920536	1	1
12	Revenge	0.898598400481905	2	4
13	Revenge	-0.191237672160451	4	3
14	Revenge	0.0870894477881778	2	4
15	Revenge	0.530041607132611	2	2
16	Revenge	0.605065934145107	2	5
17	Revenge	0.707743368326471	1	1
18	Revenge	-0.365601652445128	3	1
19	Revenge	-0.289553745054246	3	4
20	Revenge	0.261462556126599	1	1
21	Revenge	0.575209440144065	4	3
22	Revenge	-0.138660131953657	1	1
23	Revenge	-0.824850645587923	2	1
24	Revenge	0.000562696663949369	1	1
25	Revenge	0.808022842455942	7	7
26	Revenge	-0.154449492227286	2	2
27	Revenge	0.186645552730904	1	1
28	Revenge	0.642990907833267	5	4
29	Revenge	1.13630010868208	9	5
30	Revenge	-0.204310733216027	4	3
31	Revenge	0.366608907898458	5	5
32	Revenge	0.590291409950273	1	3
33	Revenge	0.404091044651488	5	5
34	Revenge	0.549131498219839	4	4
35	Revenge	0.938636832644988	1	1
36	Revenge	0.600436474884191	4	3
37	Revenge	0.0713433592866821	2	3
38	Revenge	-0.221126924713294	1	1
39	Revenge	1.44636896381585	4	5
40	Revenge	0.0525269122758452	6	7
41	Control	0.725918188596552	3	4
42	Control	0.333276277393452	5	5
43	Control	-0.115858882362954	7	6
44	Control	0.208588157911436	5	6
45	Control	-0.126110111247726	1	1
46	Control	1.3951510200277	1	1
47	Control	-0.123954006936401	1	3
48	Control	0.0585293872572947	1	1
49	Control	0.663214194122702	6	5
50	Control	-0.0158582648728043	1	1
51	Control	1.86810243382934	5	5
52	Control	-0.229850169298394	1	1
53	Control	1.55788959743222	1	1
54	Control	0.507688012847211	2	2
55	Control	-0.570228319098533	6	6
56	Control	1.02175908476056	1	1
57	Control	0.23709188925568	1	1
58	Control	0.861467943235766	1	1
59	Control	0.993819426599657	5	5
60	Control	-0.120654784371254	2	5
61	Control	-1.52359572887265	6	6
62	Control	0.0566568253634614	4	4
63	Control	0.0886397377980757	2	1
64	Control	1.49873655460397	6	6
65	Control	0.560515602224768	1	1
66	Control	2.15360316404258	4	4
67	Control	-0.012902966913316	2	3
68	Control	0.857793568196939	2	2
69	Control	0.297624474653276	4	6
70	Control	0.400871078403725	2	2
71	Control	-0.313690929862787	6	6
72	Control	0.622891597027774	4	6
73	Control	-1.06899129331282	1	2
74	Control	-0.0777421162056271	4	4
75	Control	0.508849366917275	3	2
76	Control	0.976499695243547	5	5
77	Control	0.480888914200477	1	1
78	Control	0.141270576248644	1	2
79	Control	-0.0729442734045733	8	7
80	Control	1.05207000047267	4	6
