# Supplementary material for: A neurobiological association of revenge propensity during intergroup conflict
Source: eLife. 2020 Mar 3;9:e52014. doi: 10.7554/eLife.52014 (PMC7058385; doi:10.7554/eLife.52014)
Supplement: Source code 3. [file elife-52014-code3.m]

%-----------------------------------------------------------------------
% Job configuration created by cfg_util (rev $Rev: 3944 $)
%-----------------------------------------------------------------------
matlabbatch{1}.spm.stats.factorial_design.dir = {'G:\Revenge\Revenge_vs_Control\80 Participants\Ingroup_Pain_Neu\'};
%%
matlabbatch{1}.spm.stats.factorial_design.des.t1.scans = {
                                                          'F:\fMRI\Revenge\GroupResult\Combined_Involve_Uninvolve\con01_Ingroup_Pain_Neu\sub01_con_0001.img,1'
                                                          'F:\fMRI\Revenge\GroupResult\Combined_Involve_Uninvolve\con01_Ingroup_Pain_Neu\sub02_con_0001.img,1'
                                                          'F:\fMRI\Revenge\GroupResult\Combined_Involve_Uninvolve\con01_Ingroup_Pain_Neu\sub03_con_0001.img,1'
                                                          'F:\fMRI\Revenge\GroupResult\Combined_Involve_Uninvolve\con01_Ingroup_Pain_Neu\sub04_con_0001.img,1'
                                                          'F:\fMRI\Revenge\GroupResult\Combined_Involve_Uninvolve\con01_Ingroup_Pain_Neu\sub05_con_0001.img,1'
                                                          'F:\fMRI\Revenge\GroupResult\Combined_Involve_Uninvolve\con01_Ingroup_Pain_Neu\sub06_con_0001.img,1'
                                                          'F:\fMRI\Revenge\GroupResult\Combined_Involve_Uninvolve\con01_Ingroup_Pain_Neu\sub07_con_0001.img,1'
                                                          'F:\fMRI\Revenge\GroupResult\Combined_Involve_Uninvolve\con01_Ingroup_Pain_Neu\sub08_con_0001.img,1'
                                                          'F:\fMRI\Revenge\GroupResult\Combined_Involve_Uninvolve\con01_Ingroup_Pain_Neu\sub09_con_0001.img,1'
                                                          'F:\fMRI\Revenge\GroupResult\Combined_Involve_Uninvolve\con01_Ingroup_Pain_Neu\sub10_con_0001.img,1'
                                                          'F:\fMRI\Revenge\GroupResult\Combined_Involve_Uninvolve\con01_Ingroup_Pain_Neu\sub11_con_0001.img,1'
                                                          'F:\fMRI\Revenge\GroupResult\Combined_Involve_Uninvolve\con01_Ingroup_Pain_Neu\sub14_con_0001.img,1'
                                                          'F:\fMRI\Revenge\GroupResult\Combined_Involve_Uninvolve\con01_Ingroup_Pain_Neu\sub15_con_0001.img,1'
                                                          'F:\fMRI\Revenge\GroupResult\Combined_Involve_Uninvolve\con01_Ingroup_Pain_Neu\sub16_con_0001.img,1'
                                                          'F:\fMRI\Revenge\GroupResult\Combined_Involve_Uninvolve\con01_Ingroup_Pain_Neu\sub17_con_0001.img,1'
                                                          'F:\fMRI\Revenge\GroupResult\Combined_Involve_Uninvolve\con01_Ingroup_Pain_Neu\sub18_con_0001.img,1'
                                                          'F:\fMRI\Revenge\GroupResult\Combined_Involve_Uninvolve\con01_Ingroup_Pain_Neu\sub19_con_0001.img,1'
                                                          'F:\fMRI\Revenge\GroupResult\Combined_Involve_Uninvolve\con01_Ingroup_Pain_Neu\sub20_con_0001.img,1'
                                                          'F:\fMRI\Revenge\GroupResult\Combined_Involve_Uninvolve\con01_Ingroup_Pain_Neu\sub21_con_0001.img,1'
                                                          'F:\fMRI\Revenge\GroupResult\Combined_Involve_Uninvolve\con01_Ingroup_Pain_Neu\sub22_con_0001.img,1'
                                                          'F:\fMRI\Revenge\GroupResult\Combined_Involve_Uninvolve\con01_Ingroup_Pain_Neu\sub23_con_0001.img,1'
                                                          'F:\fMRI\Revenge\GroupResult\Combined_Involve_Uninvolve\con01_Ingroup_Pain_Neu\sub24_con_0001.img,1'
                                                          'F:\fMRI\Revenge\GroupResult\Combined_Involve_Uninvolve\con01_Ingroup_Pain_Neu\sub25_con_0001.img,1'
                                                          'F:\fMRI\Revenge\GroupResult\Combined_Involve_Uninvolve\con01_Ingroup_Pain_Neu\sub26_con_0001.img,1'
                                                          'F:\fMRI\Revenge\GroupResult\Combined_Involve_Uninvolve\con01_Ingroup_Pain_Neu\sub27_con_0001.img,1'
                                                          'F:\fMRI\Revenge\GroupResult\Combined_Involve_Uninvolve\con01_Ingroup_Pain_Neu\sub29_con_0001.img,1'
                                                          'F:\fMRI\Revenge\GroupResult\Combined_Involve_Uninvolve\con01_Ingroup_Pain_Neu\sub30_con_0001.img,1'
                                                          'F:\fMRI\Revenge\GroupResult\Combined_Involve_Uninvolve\con01_Ingroup_Pain_Neu\sub31_con_0001.img,1'
                                                          'F:\fMRI\Revenge\GroupResult\Combined_Involve_Uninvolve\con01_Ingroup_Pain_Neu\sub32_con_0001.img,1'
                                                          'F:\fMRI\Revenge\GroupResult\Combined_Involve_Uninvolve\con01_Ingroup_Pain_Neu\sub33_con_0001.img,1'
                                                          'F:\fMRI\Revenge\GroupResult\Combined_Involve_Uninvolve\con01_Ingroup_Pain_Neu\sub34_con_0001.img,1'
                                                          'F:\fMRI\Revenge\GroupResult\Combined_Involve_Uninvolve\con01_Ingroup_Pain_Neu\sub35_con_0001.img,1'
                                                          'F:\fMRI\Revenge\GroupResult\Combined_Involve_Uninvolve\con01_Ingroup_Pain_Neu\sub36_con_0001.img,1'
                                                          'F:\fMRI\Revenge\GroupResult\Combined_Involve_Uninvolve\con01_Ingroup_Pain_Neu\sub37_con_0001.img,1'
                                                          'F:\fMRI\Revenge\GroupResult\Combined_Involve_Uninvolve\con01_Ingroup_Pain_Neu\sub38_con_0001.img,1'
                                                          'F:\fMRI\Revenge\GroupResult\Combined_Involve_Uninvolve\con01_Ingroup_Pain_Neu\sub40_con_0001.img,1'
                                                          'F:\fMRI\Revenge\GroupResult\Combined_Involve_Uninvolve\con01_Ingroup_Pain_Neu\sub41_con_0001.img,1'
                                                          'F:\fMRI\Revenge\GroupResult\Combined_Involve_Uninvolve\con01_Ingroup_Pain_Neu\sub82_con_0001.img,1'
                                                          'F:\fMRI\Revenge\GroupResult\Combined_Involve_Uninvolve\con01_Ingroup_Pain_Neu\sub83_con_0001.img,1'
                                                          'F:\fMRI\Revenge\GroupResult\Combined_Involve_Uninvolve\con01_Ingroup_Pain_Neu\sub85_con_0001.img,1'
                                                          'G:\Group Conflict Contagion\Renamed\Control\GroupResult_40sub_except_50_54_58_87\Combined_Involve_Uninvolve\con01_Ingroup_Pain_Neu\sub42_con_0001.img,1'
                                                          'G:\Group Conflict Contagion\Renamed\Control\GroupResult_40sub_except_50_54_58_87\Combined_Involve_Uninvolve\con01_Ingroup_Pain_Neu\sub43_con_0001.img,1'
                                                          'G:\Group Conflict Contagion\Renamed\Control\GroupResult_40sub_except_50_54_58_87\Combined_Involve_Uninvolve\con01_Ingroup_Pain_Neu\sub44_con_0001.img,1'
                                                          'G:\Group Conflict Contagion\Renamed\Control\GroupResult_40sub_except_50_54_58_87\Combined_Involve_Uninvolve\con01_Ingroup_Pain_Neu\sub45_con_0001.img,1'
                                                          'G:\Group Conflict Contagion\Renamed\Control\GroupResult_40sub_except_50_54_58_87\Combined_Involve_Uninvolve\con01_Ingroup_Pain_Neu\sub46_con_0001.img,1'
                                                          'G:\Group Conflict Contagion\Renamed\Control\GroupResult_40sub_except_50_54_58_87\Combined_Involve_Uninvolve\con01_Ingroup_Pain_Neu\sub47_con_0001.img,1'
                                                          'G:\Group Conflict Contagion\Renamed\Control\GroupResult_40sub_except_50_54_58_87\Combined_Involve_Uninvolve\con01_Ingroup_Pain_Neu\sub48_con_0001.img,1'
                                                          'G:\Group Conflict Contagion\Renamed\Control\GroupResult_40sub_except_50_54_58_87\Combined_Involve_Uninvolve\con01_Ingroup_Pain_Neu\sub49_con_0001.img,1'
                                                          'G:\Group Conflict Contagion\Renamed\Control\GroupResult_40sub_except_50_54_58_87\Combined_Involve_Uninvolve\con01_Ingroup_Pain_Neu\sub51_con_0001.img,1'
                                                          'G:\Group Conflict Contagion\Renamed\Control\GroupResult_40sub_except_50_54_58_87\Combined_Involve_Uninvolve\con01_Ingroup_Pain_Neu\sub52_con_0001.img,1'
                                                          'G:\Group Conflict Contagion\Renamed\Control\GroupResult_40sub_except_50_54_58_87\Combined_Involve_Uninvolve\con01_Ingroup_Pain_Neu\sub53_con_0001.img,1'
                                                          'G:\Group Conflict Contagion\Renamed\Control\GroupResult_40sub_except_50_54_58_87\Combined_Involve_Uninvolve\con01_Ingroup_Pain_Neu\sub55_con_0001.img,1'
                                                          'G:\Group Conflict Contagion\Renamed\Control\GroupResult_40sub_except_50_54_58_87\Combined_Involve_Uninvolve\con01_Ingroup_Pain_Neu\sub56_con_0001.img,1'
                                                          'G:\Group Conflict Contagion\Renamed\Control\GroupResult_40sub_except_50_54_58_87\Combined_Involve_Uninvolve\con01_Ingroup_Pain_Neu\sub57_con_0001.img,1'
                                                          'G:\Group Conflict Contagion\Renamed\Control\GroupResult_40sub_except_50_54_58_87\Combined_Involve_Uninvolve\con01_Ingroup_Pain_Neu\sub59_con_0001.img,1'
                                                          'G:\Group Conflict Contagion\Renamed\Control\GroupResult_40sub_except_50_54_58_87\Combined_Involve_Uninvolve\con01_Ingroup_Pain_Neu\sub60_con_0001.img,1'
                                                          'G:\Group Conflict Contagion\Renamed\Control\GroupResult_40sub_except_50_54_58_87\Combined_Involve_Uninvolve\con01_Ingroup_Pain_Neu\sub61_con_0001.img,1'
                                                          'G:\Group Conflict Contagion\Renamed\Control\GroupResult_40sub_except_50_54_58_87\Combined_Involve_Uninvolve\con01_Ingroup_Pain_Neu\sub62_con_0001.img,1'
                                                          'G:\Group Conflict Contagion\Renamed\Control\GroupResult_40sub_except_50_54_58_87\Combined_Involve_Uninvolve\con01_Ingroup_Pain_Neu\sub63_con_0001.img,1'
                                                          'G:\Group Conflict Contagion\Renamed\Control\GroupResult_40sub_except_50_54_58_87\Combined_Involve_Uninvolve\con01_Ingroup_Pain_Neu\sub64_con_0001.img,1'
                                                          'G:\Group Conflict Contagion\Renamed\Control\GroupResult_40sub_except_50_54_58_87\Combined_Involve_Uninvolve\con01_Ingroup_Pain_Neu\sub65_con_0001.img,1'
                                                          'G:\Group Conflict Contagion\Renamed\Control\GroupResult_40sub_except_50_54_58_87\Combined_Involve_Uninvolve\con01_Ingroup_Pain_Neu\sub66_con_0001.img,1'
                                                          'G:\Group Conflict Contagion\Renamed\Control\GroupResult_40sub_except_50_54_58_87\Combined_Involve_Uninvolve\con01_Ingroup_Pain_Neu\sub67_con_0001.img,1'
                                                          'G:\Group Conflict Contagion\Renamed\Control\GroupResult_40sub_except_50_54_58_87\Combined_Involve_Uninvolve\con01_Ingroup_Pain_Neu\sub68_con_0001.img,1'
                                                          'G:\Group Conflict Contagion\Renamed\Control\GroupResult_40sub_except_50_54_58_87\Combined_Involve_Uninvolve\con01_Ingroup_Pain_Neu\sub69_con_0001.img,1'
                                                          'G:\Group Conflict Contagion\Renamed\Control\GroupResult_40sub_except_50_54_58_87\Combined_Involve_Uninvolve\con01_Ingroup_Pain_Neu\sub70_con_0001.img,1'
                                                          'G:\Group Conflict Contagion\Renamed\Control\GroupResult_40sub_except_50_54_58_87\Combined_Involve_Uninvolve\con01_Ingroup_Pain_Neu\sub71_con_0001.img,1'
                                                          'G:\Group Conflict Contagion\Renamed\Control\GroupResult_40sub_except_50_54_58_87\Combined_Involve_Uninvolve\con01_Ingroup_Pain_Neu\sub72_con_0001.img,1'
                                                          'G:\Group Conflict Contagion\Renamed\Control\GroupResult_40sub_except_50_54_58_87\Combined_Involve_Uninvolve\con01_Ingroup_Pain_Neu\sub73_con_0001.img,1'
                                                          'G:\Group Conflict Contagion\Renamed\Control\GroupResult_40sub_except_50_54_58_87\Combined_Involve_Uninvolve\con01_Ingroup_Pain_Neu\sub74_con_0001.img,1'
                                                          'G:\Group Conflict Contagion\Renamed\Control\GroupResult_40sub_except_50_54_58_87\Combined_Involve_Uninvolve\con01_Ingroup_Pain_Neu\sub75_con_0001.img,1'
                                                          'G:\Group Conflict Contagion\Renamed\Control\GroupResult_40sub_except_50_54_58_87\Combined_Involve_Uninvolve\con01_Ingroup_Pain_Neu\sub76_con_0001.img,1'
                                                          'G:\Group Conflict Contagion\Renamed\Control\GroupResult_40sub_except_50_54_58_87\Combined_Involve_Uninvolve\con01_Ingroup_Pain_Neu\sub77_con_0001.img,1'
                                                          'G:\Group Conflict Contagion\Renamed\Control\GroupResult_40sub_except_50_54_58_87\Combined_Involve_Uninvolve\con01_Ingroup_Pain_Neu\sub78_con_0001.img,1'
                                                          'G:\Group Conflict Contagion\Renamed\Control\GroupResult_40sub_except_50_54_58_87\Combined_Involve_Uninvolve\con01_Ingroup_Pain_Neu\sub79_con_0001.img,1'
                                                          'G:\Group Conflict Contagion\Renamed\Control\GroupResult_40sub_except_50_54_58_87\Combined_Involve_Uninvolve\con01_Ingroup_Pain_Neu\sub80_con_0001.img,1'
                                                          'G:\Group Conflict Contagion\Renamed\Control\GroupResult_40sub_except_50_54_58_87\Combined_Involve_Uninvolve\con01_Ingroup_Pain_Neu\sub81_con_0001.img,1'
                                                          'G:\Group Conflict Contagion\Renamed\Control\GroupResult_40sub_except_50_54_58_87\Combined_Involve_Uninvolve\con01_Ingroup_Pain_Neu\sub86_con_0001.img,1'
                                                          'G:\Group Conflict Contagion\Renamed\Control\GroupResult_40sub_except_50_54_58_87\Combined_Involve_Uninvolve\con01_Ingroup_Pain_Neu\sub88_con_0001.img,1'
                                                          'G:\Group Conflict Contagion\Renamed\Control\GroupResult_40sub_except_50_54_58_87\Combined_Involve_Uninvolve\con01_Ingroup_Pain_Neu\sub89_con_0001.img,1'
                                                          };
%%
matlabbatch{1}.spm.stats.factorial_design.cov = struct('c', {}, 'cname', {}, 'iCFI', {}, 'iCC', {});
matlabbatch{1}.spm.stats.factorial_design.masking.tm.tm_none = 1;
matlabbatch{1}.spm.stats.factorial_design.masking.im = 1;
matlabbatch{1}.spm.stats.factorial_design.masking.em = {''};
matlabbatch{1}.spm.stats.factorial_design.globalc.g_omit = 1;
matlabbatch{1}.spm.stats.factorial_design.globalm.gmsca.gmsca_no = 1;
matlabbatch{1}.spm.stats.factorial_design.globalm.glonorm = 1;
matlabbatch{2}.spm.stats.fmri_est.spmmat(1) = cfg_dep;
matlabbatch{2}.spm.stats.fmri_est.spmmat(1).tname = 'Select SPM.mat';
matlabbatch{2}.spm.stats.fmri_est.spmmat(1).tgt_spec = {};
matlabbatch{2}.spm.stats.fmri_est.spmmat(1).sname = 'Factorial design specification: SPM.mat File';
matlabbatch{2}.spm.stats.fmri_est.spmmat(1).src_exbranch = substruct('.','val', '{}',{1}, '.','val', '{}',{1}, '.','val', '{}',{1});
matlabbatch{2}.spm.stats.fmri_est.spmmat(1).src_output = substruct('.','spmmat');
matlabbatch{2}.spm.stats.fmri_est.method.Classical = 1;
matlabbatch{3}.spm.stats.con.spmmat(1) = cfg_dep;
matlabbatch{3}.spm.stats.con.spmmat(1).tname = 'Select SPM.mat';
matlabbatch{3}.spm.stats.con.spmmat(1).tgt_spec = {};
matlabbatch{3}.spm.stats.con.spmmat(1).sname = 'Model estimation: SPM.mat File';
matlabbatch{3}.spm.stats.con.spmmat(1).src_exbranch = substruct('.','val', '{}',{2}, '.','val', '{}',{1}, '.','val', '{}',{1});
matlabbatch{3}.spm.stats.con.spmmat(1).src_output = substruct('.','spmmat');
matlabbatch{3}.spm.stats.con.consess{1}.tcon.name = 'Ingroup_Pain_Neu';
matlabbatch{3}.spm.stats.con.consess{1}.tcon.convec = 1;
matlabbatch{3}.spm.stats.con.consess{1}.tcon.sessrep = 'repl';
matlabbatch{3}.spm.stats.con.consess{2}.tcon.name = 'Ingroup_Neu_Pain';
matlabbatch{3}.spm.stats.con.consess{2}.tcon.convec = -1;
matlabbatch{3}.spm.stats.con.consess{2}.tcon.sessrep = 'repl';
matlabbatch{3}.spm.stats.con.delete = 0;
